# Supplementary material
Source: PubMed Central journal article supplement (PMC3893854)
Supplement: imm0141-0111-SD1.pdf [file imm0141-0111-SD1.pdf]

# **Endothelial Expression of CXCR7 and the Regulation of Systemic CXCL12 Levels**

**Robert D. Berahovich, Brian A. Zabel, Susanna Lewén, Matthew J. Walters, Karen Ebsworth, Yu Wang, Juan C. Jaen and Thomas J. Schall**

# Supplemental Figure 1

○ = Venule  
○ = Lymphatic

Isotype

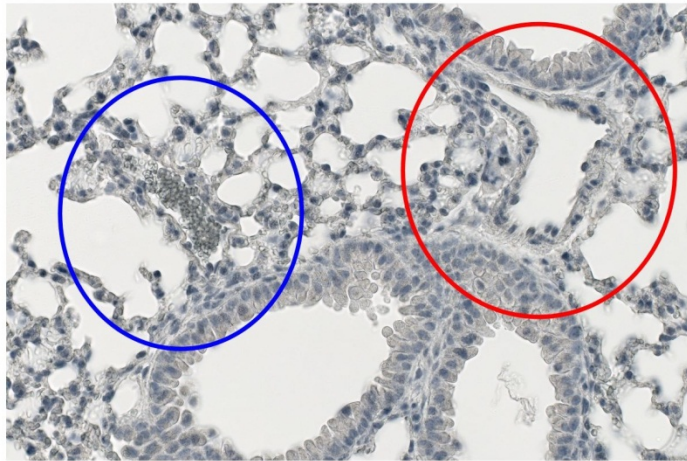

CXCR7

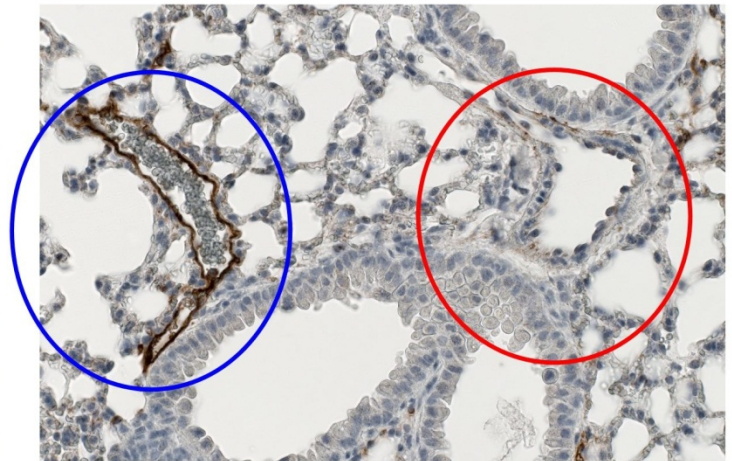

CD34

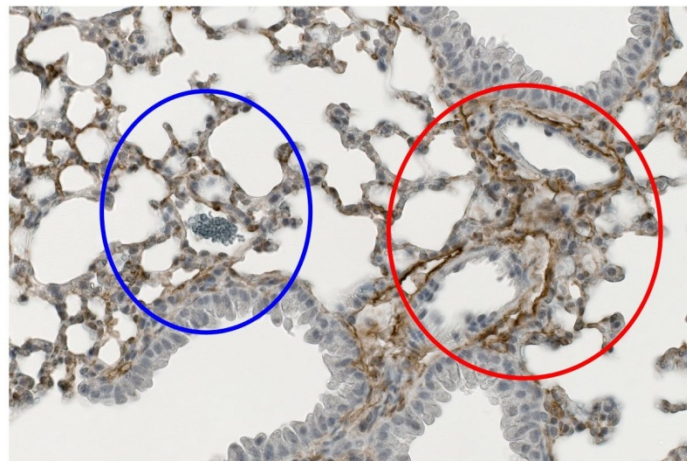

LYVE-1

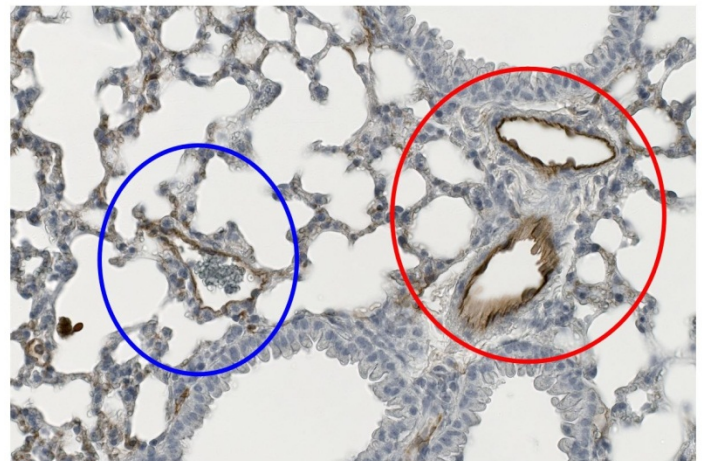

**Supplemental Figure 1. CXCR7 is detected on mouse venule but not capillary or lymphatic endothelium.** Serial sections of SCID mouse lung were stained by IHC for CD34, LYVE-1, CXCR7 and an isotype control Ab for CXCR7. The CXCR7 Ab stained a venule (blue circle) but not capillaries or a lymphatic vessel (red circle).

## Supplemental Figure 2

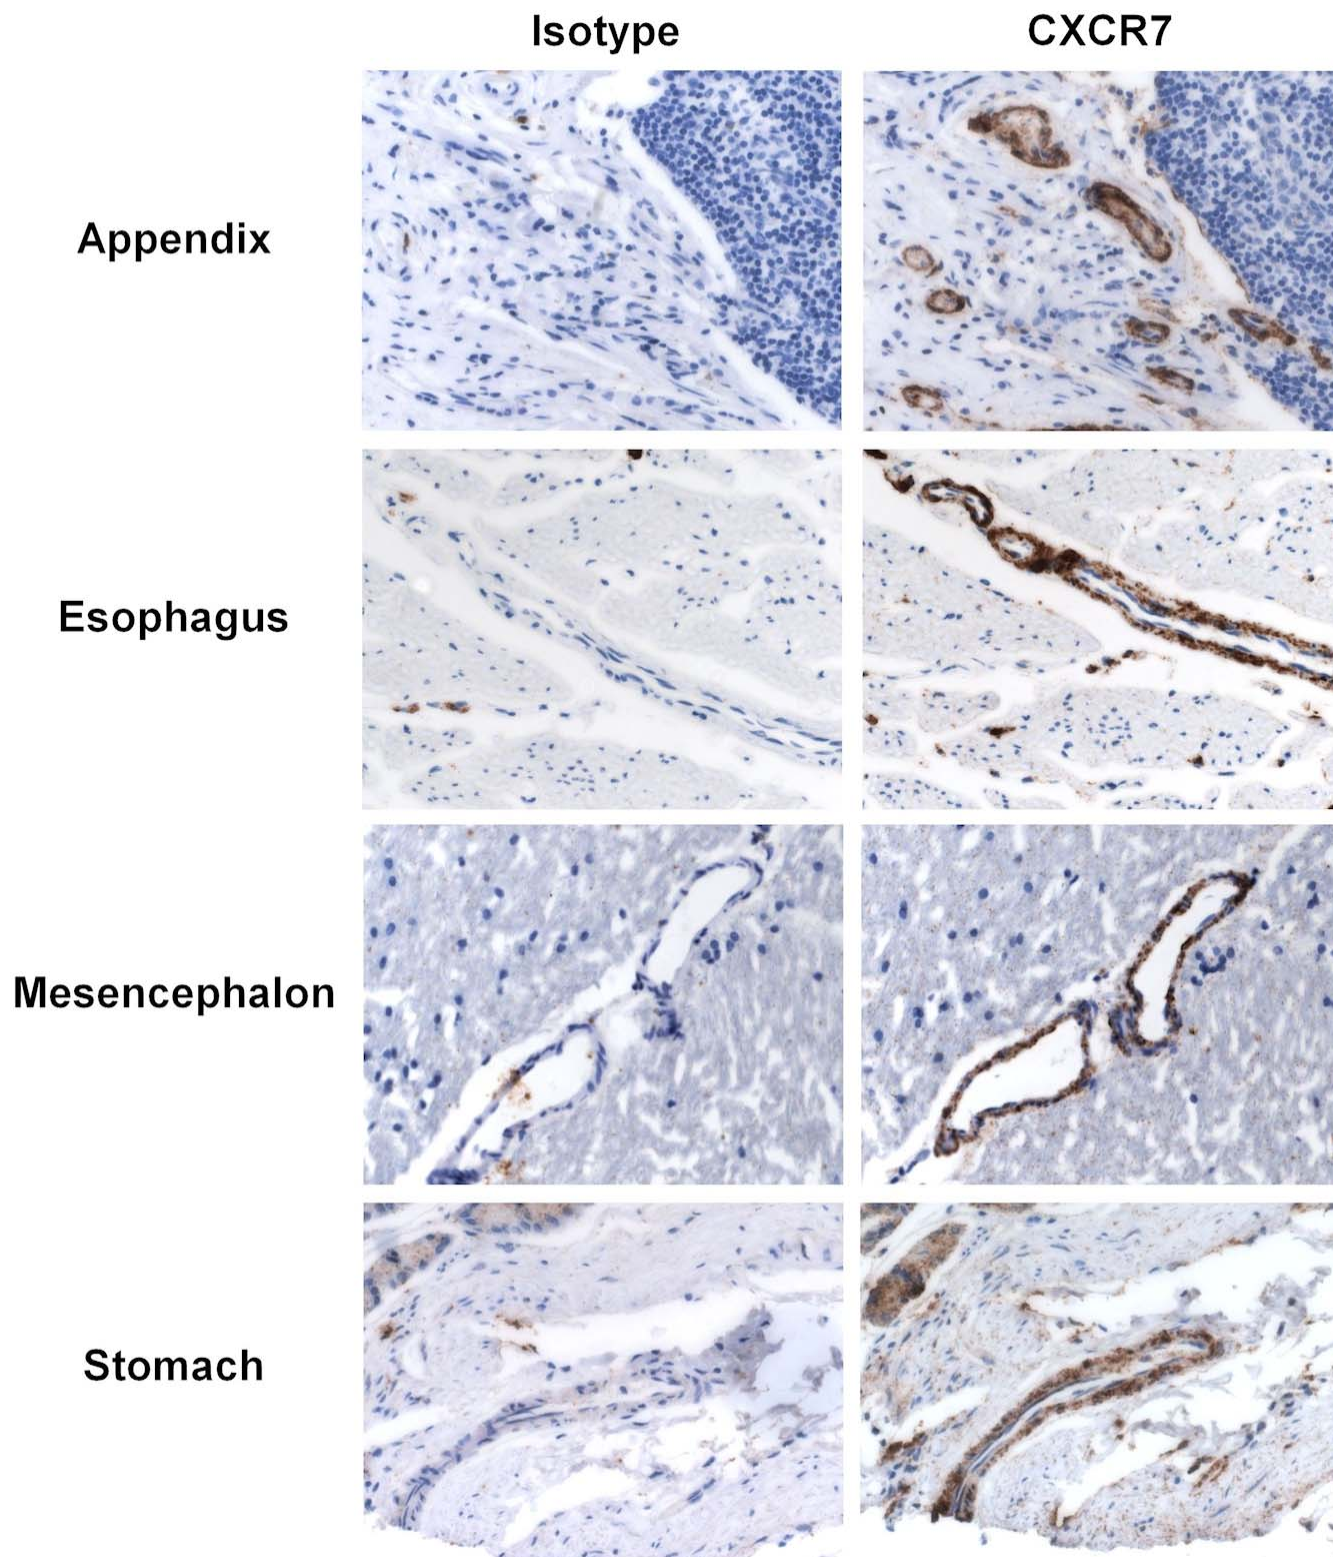

**Supplemental Figure 2. CXCR7 is detected on human vascular smooth muscle.** Sections of human tissues were stained by IHC for CXCR7 or with an isotype control Ab. The CXCR7 Ab stained vascular smooth muscle cells (punctate brown pattern) surrounding non-stained endothelial cells containing elongated nuclei.

## Supplemental Figure 3

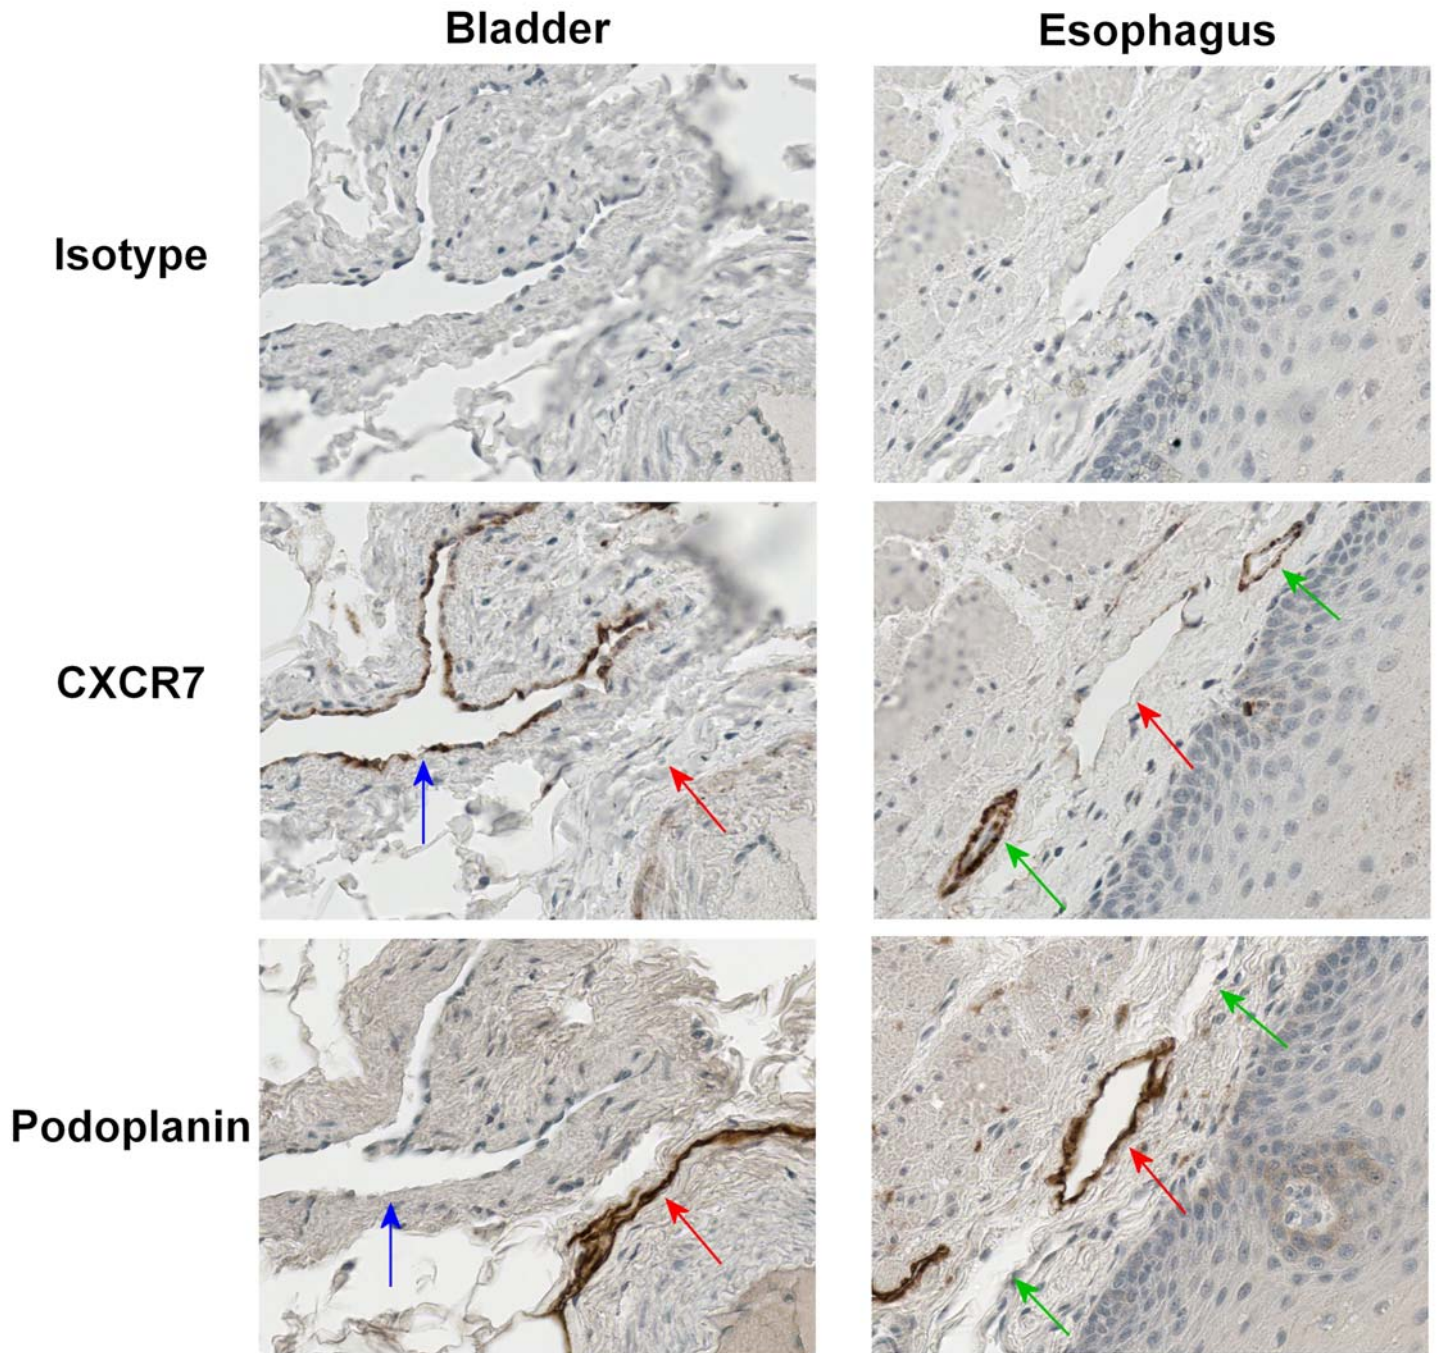

**Supplemental Figure 3. CXCR7 is not detected on human lymphatic endothelium.** Serial sections of human organs (bladder and esophagus shown here) were stained by IHC for podoplanin, CXCR7 and an isotype control Ab for CXCR7. The CXCR7 Ab stained venule endothelium (blue arrow) and arteriole smooth muscle (green arrows) but failed to stain lymphatic endothelium (red arrows).
