# Supplementary material
Source: PubMed Central journal article supplement (PMC3893854)
Supplement: imm0141-0111-SD2.pdf [file imm0141-0111-SD2.pdf]

Supplemental Table 1. Immunohistochemical staining of human tissue arrays by 11G8<sup>a,b</sup>.

| tissue                | cells stained                                                                                                                                                                       | cells not stained                                                                                                                                              | cells stained non-specifically                     |
|-----------------------|-------------------------------------------------------------------------------------------------------------------------------------------------------------------------------------|----------------------------------------------------------------------------------------------------------------------------------------------------------------|----------------------------------------------------|
| adipose               |                                                                                                                                                                                     | adipocytes                                                                                                                                                     | mast cells or macrophages                          |
| appendix              | venule endothelial cells: **<br>vascular smooth muscle cells: **<br>lamina propria macrophages: -/*/**<br>Schwann cells: *                                                          | arterial endothelial cells<br>epithelial cells<br>smooth muscle cells<br>follicle leukocytes                                                                   |                                                    |
| artery                | capillary endothelial cells: -/*/**                                                                                                                                                 | intima endothelial cells<br>smooth muscle cells                                                                                                                | macrophages                                        |
| bladder               |                                                                                                                                                                                     | smooth muscle cells                                                                                                                                            | transitional epithelial cells<br>mast cells        |
| cerebellum            | vascular smooth muscle cells: **<br>perivascular macrophages: **                                                                                                                    | endothelial cells<br>neurons<br>astrocytes<br>oligodendrocytes                                                                                                 |                                                    |
| cerebral cortex       |                                                                                                                                                                                     | endothelial cells<br>glia<br>white matter tracts                                                                                                               |                                                    |
| colon                 | venule endothelial cells: -/*/**<br>vascular smooth muscle cells: *//**<br>lamina propria macrophages: **/**<br>Schwann cells: **                                                   | arterial endothelial cells<br>epithelial cells<br>goblet cells<br>neuroendocrine cells<br>plasma cells<br>smooth muscle cells<br>ganglion cells<br>fibroblasts | submucosal macrophages or mast cells               |
| corpus callosum       | endothelial cells: **                                                                                                                                                               | glia<br>white matter                                                                                                                                           |                                                    |
| esophagus             | endothelial cells: -/*/**<br>vascular smooth muscle cells: **/**<br>fibroblasts: -/*/**<br>macrophages: -/*/**                                                                      | epithelial cells                                                                                                                                               | mast cells                                         |
| gall bladder          | venule endothelial cells: **                                                                                                                                                        | epithelial cells<br>smooth muscle cells                                                                                                                        | mast cells or macrophages                          |
| heart atrium          | endocardial endothelial cells: **<br>venule endothelial cells: *//**<br>vascular smooth muscle cells: **<br>myocytes: *                                                             | arterial endothelial cells<br>macrophages<br>adipocytes                                                                                                        |                                                    |
| heart ventricle       | venule endothelial cells: *//**<br>vascular smooth muscle cells: **<br>myocytes: *                                                                                                  | adipocytes<br>fibroblasts                                                                                                                                      |                                                    |
| heart septum          | endocardial endothelial cells: **<br>venule endothelial cells: **<br>vascular smooth muscle cells: **                                                                               | arterial endothelial cells<br>myocytes<br>adipocytes                                                                                                           |                                                    |
| heart mitral valve    | intima endothelial cells: **                                                                                                                                                        | fibroblasts                                                                                                                                                    |                                                    |
| heart tricuspid valve | intima endothelial cells: **                                                                                                                                                        | fibroblasts                                                                                                                                                    | macrophages                                        |
| heart pericardium     | vascular smooth muscle cells: *//**                                                                                                                                                 | endothelial cells                                                                                                                                              | mesothelial cells                                  |
| kidney cortex         | venule endothelial cells: **<br>vascular smooth muscle cells: -/*/**<br>distal tubule epithelial cells: *//**<br>collecting duct epithelial cells: *//**<br>thick loops of Henle: * | glomerular cells<br>venule endothelial cells<br>proximal tubule epithelial cells                                                                               |                                                    |
| kidney medulla        | collecting duct epithelial cells: **/**<br>thin loops of Henle: -/*/**                                                                                                              |                                                                                                                                                                |                                                    |
| liver                 | central vein & portal vein endothelial cells: **/**<br>hepatocytes (membranes): -/*/**                                                                                              | arterial endothelial cells<br>sinusoidal endothelial cells<br>bile ductule epithelial cells<br>Kupffer cells                                                   | hepatocytes (perinuclear)                          |
| lung                  | venule endothelial cells: **/**<br>capillary endothelial cells: *<br>alveolar macrophages: *//**                                                                                    | arterial endothelial cells<br>pneumocytes                                                                                                                      |                                                    |
| lymph node            | sinusoidal endothelial cells: **/**<br>high endothelial venule endothelial cells: **/**<br>arterial endothelial cells: -/*/**<br>vascular smooth muscle cells: -/*/**               | leukocytes                                                                                                                                                     |                                                    |
| medulla oblongata     | endothelial cells: **<br>perivascular macrophages: **                                                                                                                               | neurons<br>glia                                                                                                                                                | corpora amylacea                                   |
| mesencephalon         | vascular smooth muscle cells: **<br>perivascular & pia matter macrophages: **                                                                                                       | endothelial cells<br>neurons<br>astrocytes<br>oligodendrocytes                                                                                                 | corpora amylacea                                   |
| ovary                 | venule endothelial cells (medulla): -/*/**<br>endothelial cells (theca layer): **<br>macrophages (corpora albicantia): **/**                                                        | arterial endothelial cells<br>oocytes<br>fibroblasts                                                                                                           | macrophages (tertiary follicle)<br>granulosa cells |
| pancreas              | islets of Langerhans: *<br>adipocytes: *//**<br>macrophages: -/*/**                                                                                                                 | ductal epithelial cells<br>fibroblasts                                                                                                                         | acinar epithelial cells                            |
| peripheral nerve      | capillary endothelial cells: **<br>vascular smooth muscle cells: *//**                                                                                                              | arterial endothelial cells<br>Schwann cells                                                                                                                    | mast cells                                         |
| placenta              | capillary endothelial cells: *//**<br>trophoblast cells: **<br>macrophages: **                                                                                                      | stromal cells                                                                                                                                                  |                                                    |
| pons                  | vascular smooth muscle cells: **                                                                                                                                                    | endothelial cells<br>neurons<br>astrocytes<br>oligodendrocytes                                                                                                 |                                                    |
| prostate              | venule endothelial cells: *//**<br>superficial epithelial cells: *//**<br>ganglion cells: *//**                                                                                     | smooth muscle cells<br>Schwann cells<br>reserve cells                                                                                                          |                                                    |
| skeletal muscle       | vascular smooth muscle cells: **<br>interstitial macrophages: **                                                                                                                    | arterial endothelial cells<br>myocytes<br>fibroblasts                                                                                                          |                                                    |
| small intestine       | capillary & venule endothelial cells: -/*/**<br>vascular smooth muscle cells: **/**<br>macrophages: **<br>neuroendocrine cells: *                                                   | arterial endothelial cells<br>epithelial cells<br>smooth muscle cells<br>Brunner's gland cells<br>plasma cells                                                 | mast cells                                         |
| spinal cord           |                                                                                                                                                                                     | glia<br>white matter tracts                                                                                                                                    |                                                    |

Legends

Staining Frequency

\* faint staining  
\*\* moderate staining  
\*\*\* strong staining  
\*/\*\* faint to moderate staining  
\*\*/\*\* moderate to strong staining  
-/\*/\*\* occasionally faint to moderate staining  
-/\*\*\* occasionally moderate staining  
-/\*/\*\* occasionally moderate to strong staining  
-/\*\*\* occasionally strong staining

Colors

endothelial cells  
arterial endothelial cells  
vascular smooth muscle cells  
macrophages  
epithelial cells  
adipocytes

a: "thin-walled vessels" indicates venules or capillaries  
b: colors shown to help identify common cell types (see Legends)

|         |                                                                                                                                              |                                                                                                            |                            |
|---------|----------------------------------------------------------------------------------------------------------------------------------------------|------------------------------------------------------------------------------------------------------------|----------------------------|
| spleen  | sinusoidal endothelial cells: **                                                                                                             | arterial endothelial cells<br>leukocytes                                                                   |                            |
| stomach | venule endothelial cells: -/**/****<br>vascular smooth muscle cells: **/****<br>macrophages: **/****<br>epithelium: */**<br>adipocytes: -/** | arterial endothelial cells<br>smooth muscle cells                                                          | mast cells                 |
| testis  | venule endothelial cells: -/**<br>seminiferous epithelial cells: */**<br>macrophages: **/****                                                | arterial endothelial cells<br>capsule fibroblast cells                                                     | mast cells<br>Leydig cells |
| thymus  | venule endothelial cells: ***                                                                                                                | arterial endothelial cells<br>vascular smooth muscle cells<br>epithelial cells<br>adipocytes<br>thymocytes | mast cells                 |
| tonsil  | endothelial cells: -/**/****<br>vascular smooth muscle cells: -/**/****<br>basaloid epithelial cells: **/****                                | superficial epithelial cells<br>leukocytes                                                                 |                            |
| uterus  | venule endothelial cells: -/**<br>vascular smooth muscle cells: **<br>endometrial glandular epithelial cells: -/**/****                      | arterial endothelial cells<br>smooth muscle cells                                                          | mast cells                 |
| vein    | venule endothelial cells: **/****                                                                                                            | intima endothelial cells<br>smooth muscle cells<br>fibroblasts<br>adipocytes                               |                            |
